# Supplementary material
Source: PubMed Central journal article supplement (PMC4892124)
Supplement: NIHMS514391-supplement-Supplementary_Information.pdf [file NIHMS514391-supplement-Supplementary_Information.pdf]

Supplementary Information of

## **Modification of TiO<sub>2</sub> by Bimetallic Au-Cu Nanoparticles for Wastewater Treatment**

**Zibin Hai,<sup>a,b</sup> Nadia EL Kolli,<sup>a</sup> Daniel Bahena Uribe,<sup>c</sup> Patricia Beaunier,<sup>d</sup> Miguel José-Yacamán,<sup>c</sup> Jackie Vigneron,<sup>e</sup> Arnaud Etcheberry,<sup>e</sup> Sébastien Sorgues,<sup>a</sup> Christophe Colbeau-Justin,<sup>a</sup> Jiafu Chen<sup>b</sup> and Hynd Remita<sup>\*a</sup>**

<sup>a</sup> Hefei National Laboratory for Physical Sciences at Microscale, University of Science and Technology of China, Hefei, Anhui 230026, People's Republic of China

<sup>b</sup> Laboratoire de Chimie Physique, CNRS - UMR 8000, Université Paris-Sud, Bâtiment 349, 91405 Orsay, France

<sup>c</sup> Laboratoire de Réactivité de Surface, UPMC Université Paris 6, UMR 7197-CNRS, 3 rue Galilée, 94200 Ivry, France

<sup>d</sup> Department of Physics & Astronomy, The University of Texas at San Antonio, One UTSA Circle, San Antonio, TX 78249, USA

<sup>e</sup> Institut Lavoisier de Versailles CNRS UMR 8180 45 Avenue des Etats Unis 78035 Versailles France

\*Corresponding author, mailing address: [hynd.remita@u-psud.fr](mailto:hynd.remita@u-psud.fr)

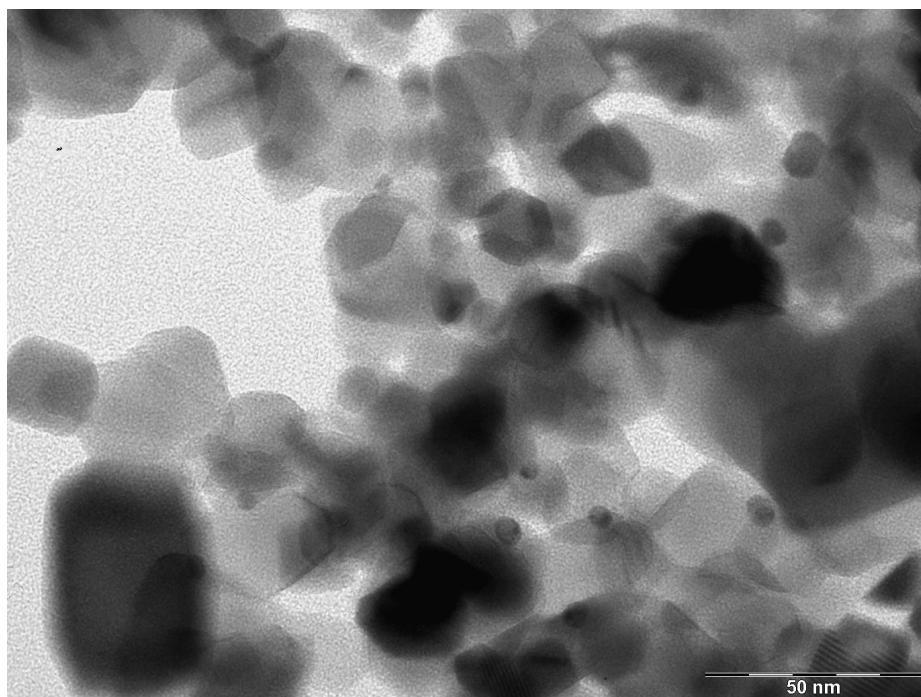

**Figure S1.** TEM image of AuCu1:3/P25 by the chemical method with THPC.

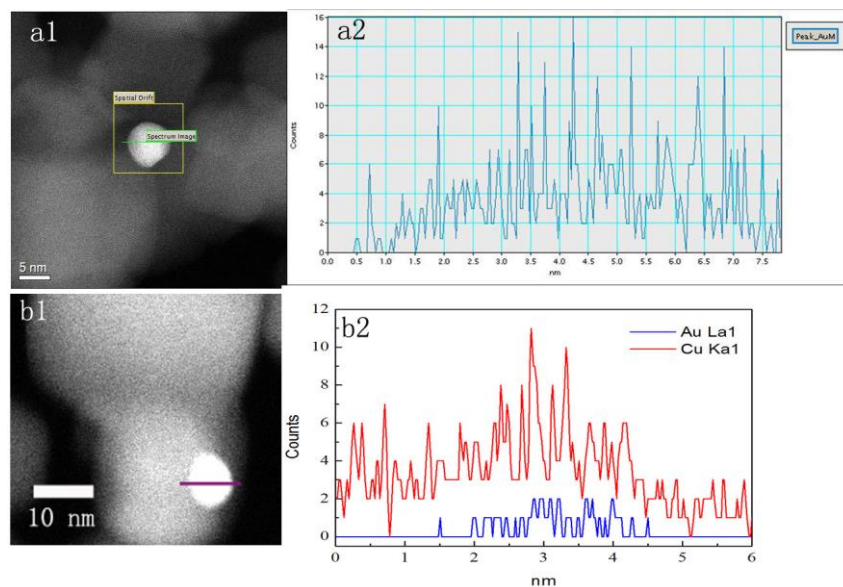

**Figure S2.** Energy dispersive X-ray spectroscopy line scans across external nanowires of nanoparticles (profiles were taken along the green line) and corresponding STEM images for the samples of (a) Au/P25, (b) AuCu1:3/P25. The blue line corresponds to CuK and the red one to AuL signal.

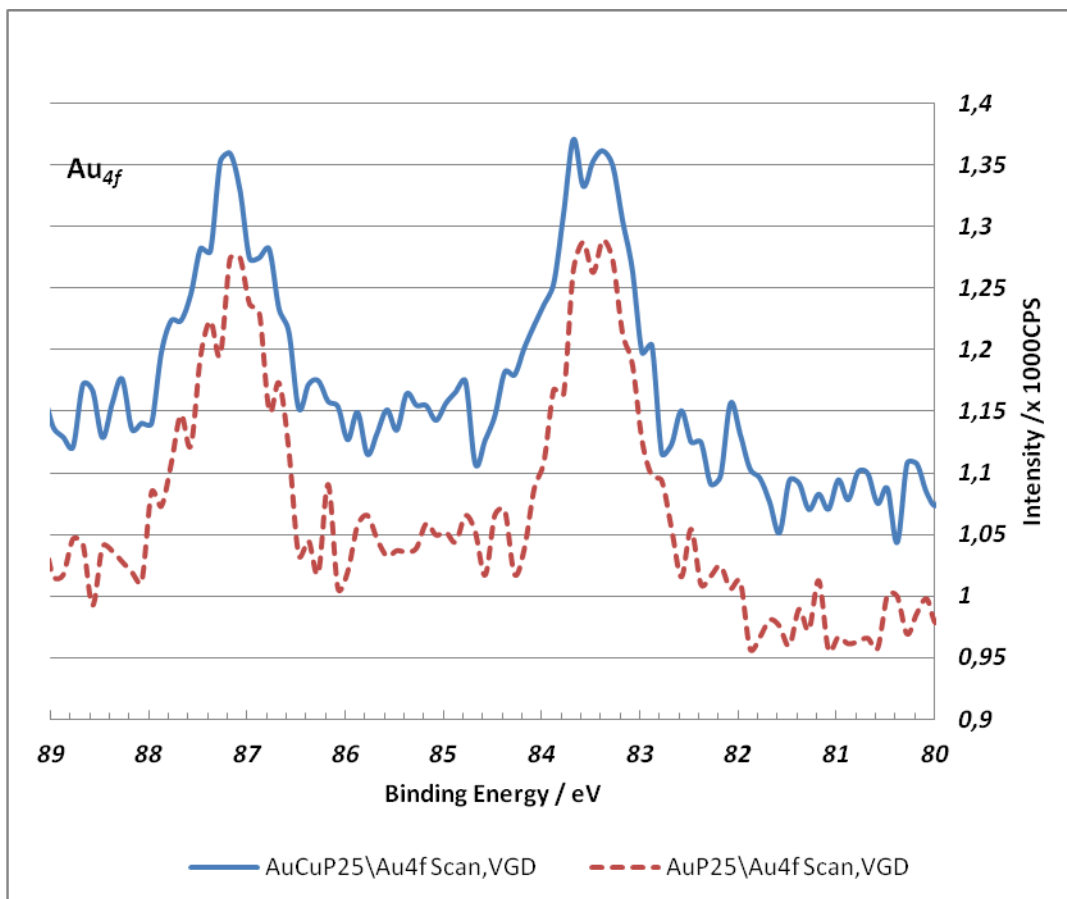

**Figure S3.** Au<sub>4f</sub> region of the XPS spectra of the sample AuCu1:1/P25 (blue) and Au/P25 (red).

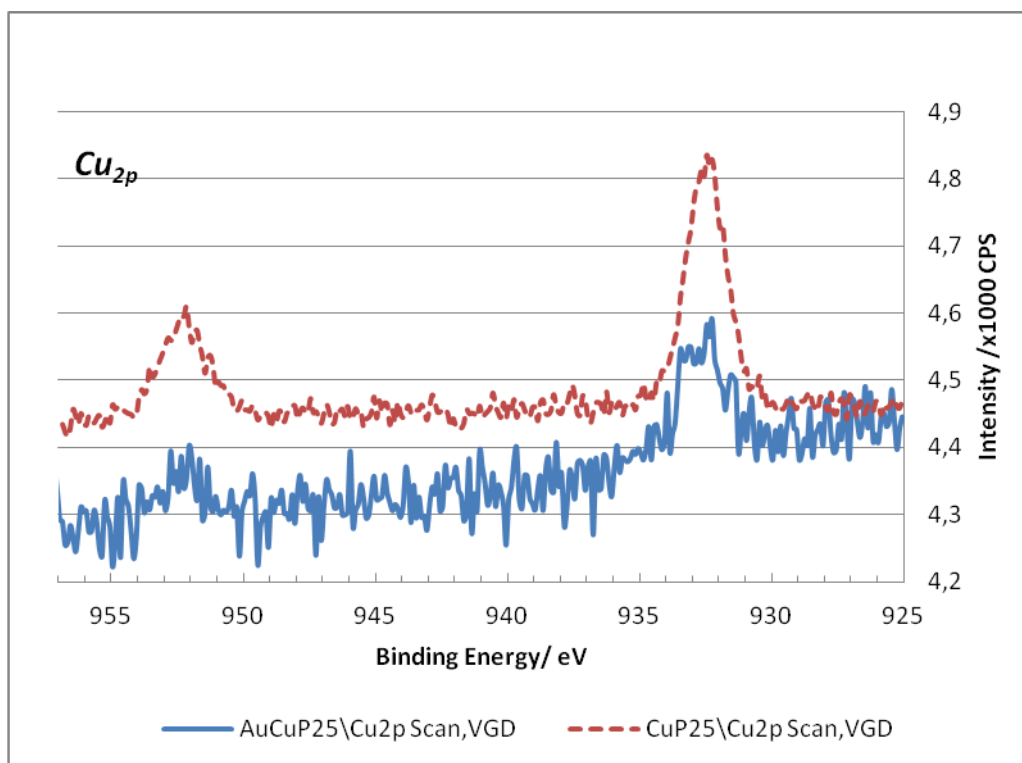

**Figure S4.** Cu<sub>2p</sub> region of the XPS spectra of the sample AuCu1:1/P25 (blue) and Cu/P25 (red).

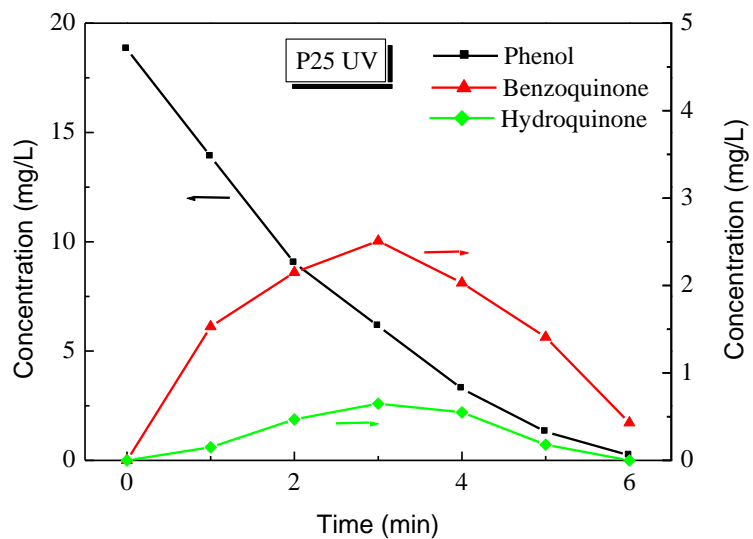

**Figure S5.** Photodegradation of Phenol by the photocatalyst of P25 under UV illumination. The initial concentration of Phenol is  $2 \times 10^{-4}$  M, which is equal to 18.82 ppm.

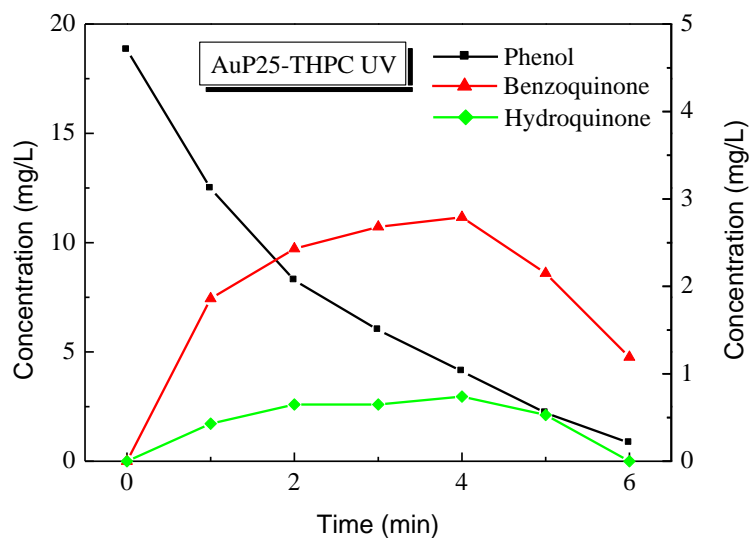

**Figure S6.** Photodegradation of Phenol by the photocatalyst of Au/P25 under UV illumination. The initial concentration of Phenol is  $2 \times 10^{-4}$  M, which is equal to 18.82 ppm.

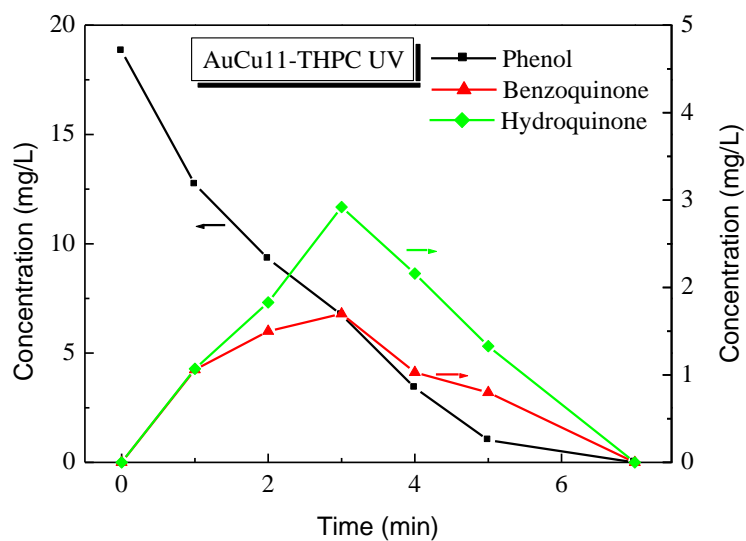

**Figure S7.** Photodegradation of Phenol by the photocatalyst of AuCu1:1/P25 under UV illumination. The initial concentration of Phenol is  $2 \times 10^{-4}$  M, which is equal to 18.82 ppm.

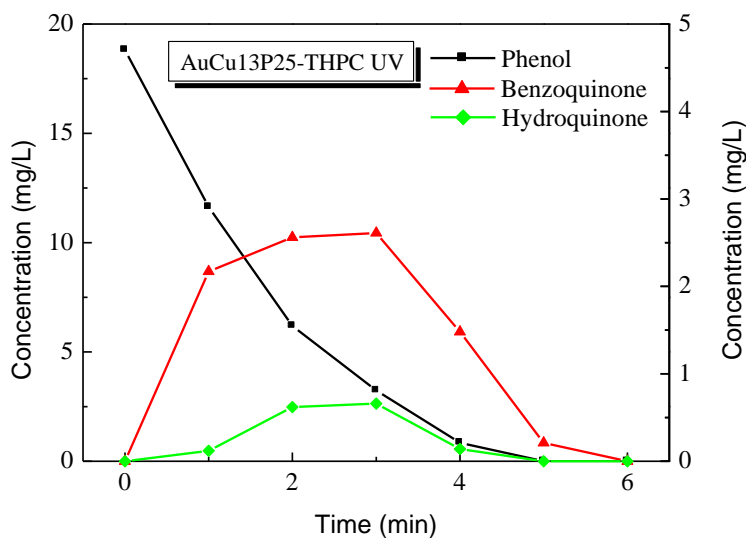

**Figure S8.** Photodegradation of Phenol by the photocatalyst of AuCu1:3/P25 under UV illumination. The initial concentration of Phenol is  $2 \times 10^{-4}$  M, which is equal to 18.82 ppm.

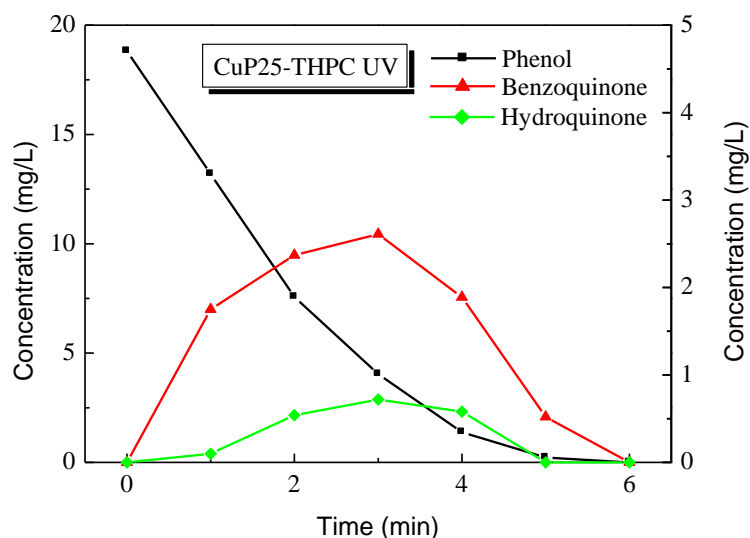

**Figure S9.** Photodegradation of Phenol by the photocatalyst of Cu/P25 under UV illumination. The initial concentration of Phenol is  $2 \times 10^{-4}$  M, which is equal to 18.82 ppm.

**TABLE S1.** Rate constants of the first-order reaction of Phenol photodegradation

| Samples     | $K$ (rate constant)<br>( $10^{-3} \text{ s}^{-1}$ ) | R (correlation coefficient) | B (intercept)<br>(s) |
|-------------|-----------------------------------------------------|-----------------------------|----------------------|
| P25         | $0.0086 \pm 0.0009$                                 | 0.979                       | $0.19 \pm 0.16$      |
| Au/P25      | $0.0089 \pm 0.0007$                                 | 0.980                       | $0.14 \pm 0.16$      |
| AuCu1:1/P25 | $0.0111 \pm 0.0012$                                 | 0.976                       | $0.27 \pm 0.23$      |
| AuCu1:3/P25 | $0.0125 \pm 0.0015$                                 | 0.978                       | $0.20 \pm 0.22$      |
| Cu/P25      | $0.0107 \pm 0.0013$                                 | 0.980                       | $0.20 \pm 0.19$      |

These values are obtained by the ORIGIN 6.0 based on the data of photodegradation of Phenol. The data of  $\ln(C_t/C_0)$  versus time were simulated by linear fit without crossing through the zero mandatorily.

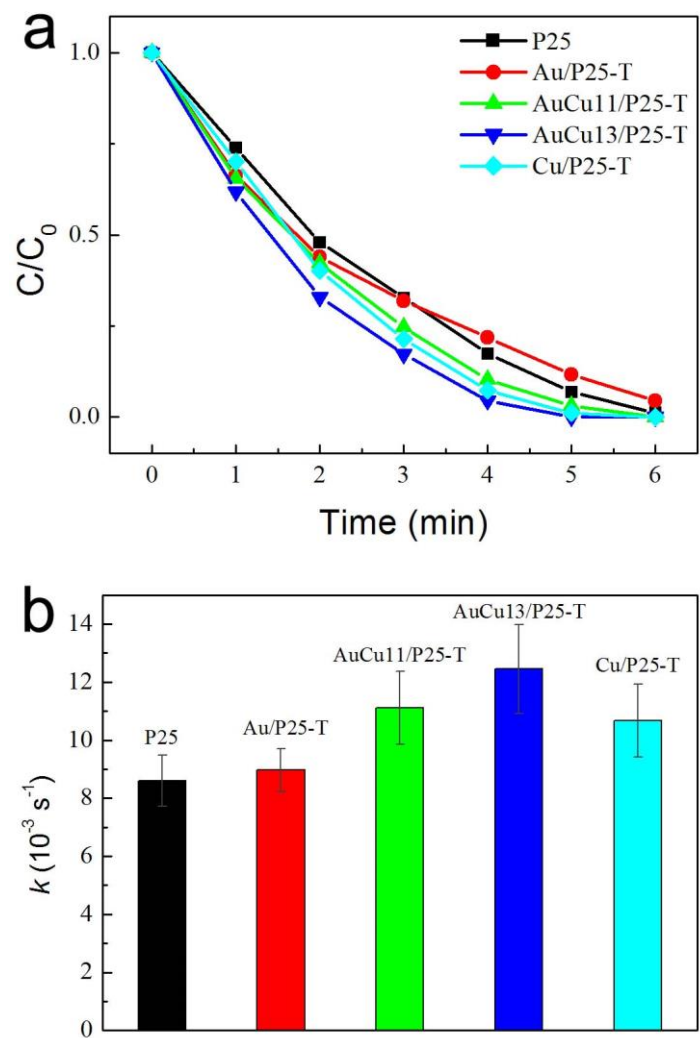

**Figure S10. (a)** The time courses of phenol relative concentration in photodegradation under UV illumination with pure P25, and modified P25 without thermal treatment, **(b)** the rate constants of the corresponding photodegradation.
